# Supplementary material for: Multimodality Imaging in Cardiooncology
Source: J Oncol. 2015 Aug 2;2015:263950. doi: 10.1155/2015/263950 (PMC4537747; doi:10.1155/2015/263950)
Supplement: Supplementary file 1 — Videos 1 and 2 show two-dimensional echocardiography. The videos show wall motion in the apical four-chamber view before (Video 1) and after (Video 2) one month of chemotherapy. The apical segments show a decreasing of the systolic function. Videos 3 and 4 show two-dimensional echocardiography; The videos show wall motion in the apical four-chamber view before (Video 3) and after (Video 4) chemotherapy. left ventricular ejection fraction is not significantly altered, however, global longitudinal strain revealed a subclinical impairment of the deformation in this patient (see Figure 1). [file 263950.f1.zip]

Archive with 4 entries (4 files):
- video1.avi
- video2.avi
- video3.avi
- video4.avi
